# Supplementary material
Source: PubMed Central journal article supplement (PMC4717906)
Supplement: NIHMS750562-supplement-Supplementary_materials.pdf [file NIHMS750562-supplement-Supplementary_materials.pdf]

## Supplementary Materials

### Supplementary Table 1: Recommended methods for fixed gene set enrichment analysis.

#### (A) Recommended methods:

| Method       | Algorithm                                          | Platform   | Data       | URL                                                                                                                                               | Ref |
|--------------|----------------------------------------------------|------------|------------|---------------------------------------------------------------------------------------------------------------------------------------------------|-----|
| g:Profiler   | ORA+FET<br>(modified<br>for ordered<br>gene lists) | WT, RP     | GL         | <a href="http://biit.cs.ut.ee/gprofiler">http://biit.cs.ut.ee/gprofiler</a>                                                                       | 1   |
| CAMERA       | ORA+FET<br>(corrected<br>for gene<br>correlation)  | RP         | GL,<br>EXP | <a href="http://www.bioconductor.org/packages/release/bioc/html/limma.html">http://www.bioconductor.org/packages/release/bioc/html/limma.html</a> | 2   |
| GO           | DB                                                 | WT, DS     | NA         | <a href="http://geneontology.org">http://geneontology.org</a>                                                                                     | 3   |
| GSEA, ssGSEA | FCS+KS                                             | DS, CL, RP | GLV        | <a href="http://www.broadinstitute.org/gsea">http://www.broadinstitute.org/gsea</a>                                                               | 4   |
| GSVA         | FCS+KS                                             | RP         | GLV        | <a href="http://www.bioconductor.org/packages/release/bioc/html/GSVA.html">http://www.bioconductor.org/packages/release/bioc/html/GSVA.html</a>   | 5   |
| HumanCyc     | DB                                                 | WT         | NA         | <a href="http://humancyc.org">http://humancyc.org</a>                                                                                             | 6   |
| KEGG         | DB                                                 | WT, DS     | NA         | <a href="http://www.genome.jp/kegg/pathway.html">http://www.genome.jp/kegg/pathway.html</a>                                                       | 7   |
| REACTOME     | DB                                                 | WT, DS     | NA         | <a href="http://www.reactome.org">http://www.reactome.org</a>                                                                                     | 8   |
| SLEA         | FCS+Z                                              | DS, CL     | GLV        | <a href="http://bg.upf.edu/slea">http://bg.upf.edu/slea</a>                                                                                       | 9   |

#### (B) Additional methods:

| Method     | Algorithm         | Platform      | Data    | URL                                                                                                                                                   | Ref |
|------------|-------------------|---------------|---------|-------------------------------------------------------------------------------------------------------------------------------------------------------|-----|
| Babelomics | ORA,<br>FCS+FET   | WT            | GL      | <a href="http://www.babelomics.org">http://www.babelomics.org</a>                                                                                     | 10  |
| BiNGO      | ORA+HT            | CP            | GL      | <a href="http://www.psb.ugent.be/cbd/papers/BiNGO">http://www.psb.ugent.be/cbd/papers/BiNGO</a>                                                       | 11  |
| ConceptGen | ORA+FET           | WT            | GL      | <a href="http://conceptgen.ncibi.org">http://conceptgen.ncibi.org</a>                                                                                 | 12  |
| Gitools    | ORA+FET,<br>FCS+Z | DS, CL        | GL, GLV | <a href="http://www.gitools.org">http://www.gitools.org</a>                                                                                           | 13  |
| GoMiner    | ORA+FET           | WT            | GL      | <a href="http://discover.nci.nih.gov/gominer">http://discover.nci.nih.gov/gominer</a>                                                                 | 14  |
| GOstats    | ORA+HT            | RP            | GL      | <a href="http://www.bioconductor.org/packages/release/bioc/html/GOstats.html">http://www.bioconductor.org/packages/release/bioc/html/GOstats.html</a> | 15  |
| iPAGE      | ORA+MI            | DS, CL,<br>WT | GL      | <a href="https://tavazoielab.c2b2.columbia.edu/iPAGE">https://tavazoielab.c2b2.columbia.edu/iPAGE</a>                                                 | 16  |
| ToppGene   | ORA               | WT            | GL      | <a href="http://toppgene.cchmc.org">http://toppgene.cchmc.org</a>                                                                                     | 17  |

**Supplementary Table 2: Recommended methods for *de novo* network construction and clustering.**

**(A) Recommended methods:**

| Method        | Algorithm   | Platform   | Data               | URL                                                                                                     | Ref |
|---------------|-------------|------------|--------------------|---------------------------------------------------------------------------------------------------------|-----|
| BioGRID       | DB          | WT, DS     | NA                 | <a href="http://thebiogrid.org">http://thebiogrid.org</a>                                               | 18  |
| EnrichNet     | RWR         | DS, WT, CP | GL                 | <a href="http://www.enrichnet.org">http://www.enrichnet.org</a>                                         | 19  |
| GeneMANIA     | DB, RR      | CP, WT     | GL                 | <a href="http://www.genemania.org">http://www.genemania.org</a>                                         | 20  |
| Hypermodules  | GS+CC       | CL, CP     | GL, CD             | <a href="http://apps.cytoscape.org/apps/hypermodules">http://apps.cytoscape.org/apps/hypermodules</a>   | 21  |
| INTACT        | DB          | WT, DS     | NA                 | <a href="http://www.ebi.ac.uk/intact">http://www.ebi.ac.uk/intact</a>                                   | 22  |
| iRefIndex     | DB          | DS         | NA                 | <a href="http://irefindex.org/wiki/index.php">http://irefindex.org/wiki/index.php</a>                   | 23  |
| MEMo          | ME          | CL, DS     | SSM, SNA           | <a href="http://cbio.mskcc.org/tools/memo">http://cbio.mskcc.org/tools/memo</a>                         | 24  |
| NetBox        | EB          | CL, DS     | GL                 | <a href="http://cbio.mskcc.org/tools/netbox">http://cbio.mskcc.org/tools/netbox</a>                     | 25  |
| ReactomeFIViz | GC, FG, MCL | CP         | GL, GLV            | <a href="http://apps.cytoscape.org/apps/reactomefiviz">http://apps.cytoscape.org/apps/reactomefiviz</a> | 26  |
| ResponseNet   | MCFL        | CP, WT     | GLV (gene weights) | <a href="http://bioinfo.bgu.ac.il/respnet">http://bioinfo.bgu.ac.il/respnet</a>                         | 27  |
| STRING        | DB          | WT, DS     | NA                 | <a href="http://string-db.org">http://string-db.org</a>                                                 | 28  |

**(B) Additional methods:**

| Method    | Algorithm | Platform   | Data          | URL                                                                                                                                                                             | Ref |
|-----------|-----------|------------|---------------|---------------------------------------------------------------------------------------------------------------------------------------------------------------------------------|-----|
| Dendrix   | ME        | CP, DS, WT | SM            | <a href="http://compbio.cs.brown.edu/projects/dendrix">http://compbio.cs.brown.edu/projects/dendrix</a>                                                                         | 29  |
| iCluster+ | GLV       | RP         | SSM, SNA, EXP | <a href="http://www.mskcc.org/research/epidemiology-biostatistics/biostatistics/iclusplus">http://www.mskcc.org/research/epidemiology-biostatistics/biostatistics/iclusplus</a> | 30  |
| Pathifier | PDS       | CL, RP     | EXP           | <a href="http://www.weizmann.ac.il/complex/compphys/software/yotam/pathifier">http://www.weizmann.ac.il/complex/compphys/software/yotam/pathifier</a>                           | 31  |
| SIRENE    | BC        | ML         | EXP           | <a href="http://cbio.ensmp.fr/sirene">http://cbio.ensmp.fr/sirene</a>                                                                                                           | 32  |

**Supplementary Table 3: Recommended methods for network-based modeling.**

**(A) Recommended methods:**

| Method         | Algorithm | Platform   | Data                 | URL                                                                                                                                                   | Ref |
|----------------|-----------|------------|----------------------|-------------------------------------------------------------------------------------------------------------------------------------------------------|-----|
| HotNet         | UD        | ML         | GLV                  | <a href="http://compbio.cs.brown.edu/projects/hotnet">http://compbio.cs.brown.edu/projects/hotnet</a>                                                 | 33  |
| TieDIE         | UD        | CL, ML     | SSM, SCNA, EXP       | <a href="https://sysbiowiki.soe.ucsc.edu/tiedie">https://sysbiowiki.soe.ucsc.edu/tiedie</a>                                                           | 34  |
| SPIA           | RW        | RP         | EXP                  | <a href="http://www.bioconductor.org/packages/devel/bioc/html/SPIA.html">http://www.bioconductor.org/packages/devel/bioc/html/SPIA.html</a>           | 35  |
| ARACNE         | DPI       | CL, DS, RP | EXP                  | <a href="http://wiki.c2b2.columbia.edu/califanolab/index.php/Software/ARACNE">http://wiki.c2b2.columbia.edu/califanolab/index.php/Software/ARACNE</a> | 36  |
| GENIE3         | LR        | ML, RC     | EXP                  | <a href="http://homepages.inf.ed.ac.uk/vhuynht/software.html">http://homepages.inf.ed.ac.uk/vhuynht/software.html</a>                                 | 37  |
| PARADIGM       | PGM       | WT, DS, CL | SSM, SCNA, EXP, METH | <a href="http://paradigm.five3genomics.com">http://paradigm.five3genomics.com</a>                                                                     | 38  |
| PARADIGM-Shift | PGM       | DS         | SSM, SCNA, EXP, METH | <a href="http://github.org/sng87/paradigmshift">http://github.org/sng87/paradigmshift</a>                                                             | 39  |
| PathOlogist    | PGM       | CL, ML     | EXP                  | <a href="ftp://ftp1.nci.nih.gov/pub/pathologist">ftp://ftp1.nci.nih.gov/pub/pathologist</a>                                                           | 40  |
| DataRail       | BKRM      | DS, RP, CP | EXP+PD               | <a href="https://code.google.com/p/sbpipeline/wiki/DataRail">https://code.google.com/p/sbpipeline/wiki/DataRail</a>                                   | 41  |

**(B) Additional methods:**

| Method            | Algorithm | Platform   | Data      | URL                                                                                                                             | Ref |
|-------------------|-----------|------------|-----------|---------------------------------------------------------------------------------------------------------------------------------|-----|
| PSA               | NF        | CA         | EXP, CHIP | <a href="http://apps.cytoscape.org/apps/pathwayscoringapplication">http://apps.cytoscape.org/apps/pathwayscoringapplication</a> | 42  |
| NetPhorest        | NF        | WT         | GL        | <a href="http://netphorest.info">http://netphorest.info</a>                                                                     | 43  |
| NetworkKIN        | NF        | WT         | GL        | <a href="http://networkin.info">http://networkin.info</a>                                                                       | 44  |
| CellNet-Optimizer | BKRM      | DS, RP, CP | EXP+PD    | <a href="http://www.cellnopt.org">http://www.cellnopt.org</a>                                                                   | 45  |

**Code for platform type:**

CL: Command line tool  
CP: Cytoscape plugin  
DS: Downloadable software/database  
ML: Matlab code available  
RC: R code  
RP: R package (Bioconductor)  
WT: Web tool

**Code for Method Type:**

BC: Binary classifier  
BHC: Bayesian hierarchical clustering  
DB: Reference Database  
EB: Edge-betweenness subnetwork detection  
FCS+KS: Functional class scoring using Kolmogorov–Smirnov rank statistics  
FCS+Z: Functional class scoring using z-score rank statistics  
FG: Factor-graph subnetwork detection  
GLV: Gaussian latent variable model subnetwork detection  
LR: Linear regression  
MCFL: Minimum-cost flow optimization subnetwork detection  
MCL: Markov-chain clustering  
MDPI: Mutual information + data processing inequality  
ME: Mutually exclusive subnetworks  
MIP: Mixed integer programming  
NF: Network flow type, incorporates direction and inhibitory/excitatory  
ORA+FET: Over-representation analysis using Fisher's exact test  
ORA+MI: Over-representation analysis using mutual information statistic  
PDS: Pathway deregulation score based on tumor RNA expression data  
PGM: Probabilistic Graphical Model  
REA: Recursive enumeration algorithm on network weighted for predicted oncogenicity of edges  
RR: Ridge regression clustering  
RW: Random walk  
UD: Undirected diffusion; incorporates undirected links

**Code for data type:**

CD: Clinical data  
CHIP: ChIP-seq  
EXP: Gene list with RNA expression values  
GL: Gene list (e.g. mutated genes, thresholded RNA fold-change)  
GLV: Gene list with values (typically RNA fold-change)  
SSM: Simple somatic mutations  
SCNA: Somatic copy number alterations  
PD: Perturbation data (e.g. small molecule screens)  
METH: DNA methylation  
NA: Not applicable

## Supplementary references

1. Reimand, J. *et al.* g:Profiler--a web-based toolset for functional profiling of gene lists from large-scale experiments. *Nucleic Acids Res.* **35**, W193-200 (2007).
2. Wu D, Smyth GK. Camera: a competitive gene set test accounting for inter-gene correlation. *Nucleic Acids Res.* **40**, e133 (2012).
3. The Gene Ontology Consortium. The Gene Ontology in 2010: extensions and refinements. *Nucleic Acids Res.* **38**, D331-5 (2010).
4. Subramanian, A. *et al.* Gene set enrichment analysis: A knowledge-based approach for interpreting genome-wide expression profiles. *Proc Natl Acad Sci U S A.* **102**, 15545-15550 (2005).
5. Hänzelmann, S., Castelo, R. & Guinney J. GSEA: gene set variation analysis for microarray and RNA-seq data. *BMC Bioinformatics.* **14**, 7 (2013).
6. Caspi, R. *et al.* The MetaCyc database of metabolic pathways and enzymes and the BioCyc collection of Pathway/Genome Databases. *Nucleic Acids Res.* **42**, D459-71 (2014).
7. Kanehisa, M. *et al.* Data, information, knowledge and principle: back to metabolism in KEGG. *Nucleic Acids Res.* **42**, D199-205 (2014).
8. Croft D. *et al.* The Reactome pathway knowledgebase. *Nucleic Acids Res.* **42**, D472-7 (2014).
9. Gundem, G., Lopez-Bigas, N. Sample-level enrichment analysis unravels shared stress phenotypes among multiple cancer types. *Genome Med.* **4**, 28 (2012).
10. Medina, I. *et al.* Babelomics: an integrative platform for the analysis of transcriptomics, proteomics and genomic data with advanced functional profiling. *Nucleic Acids Res.* **38**, W210-213 (2010).
11. Maere, S., Heymans, K., Kuiper, M. BiNGO: a Cytoscape plugin to assess overrepresentation of gene ontology categories in biological networks. *Bioinformatics* **21**, 3448-3449 (2005).
12. Sartor, M.A. *et al.* ConceptGen: a gene set enrichment and gene set relation mapping tool. *Bioinformatics* **26**, 456-463 (2010).
13. Perez-Llamas, C., Lopez-Bigas, N. Gitools: analysis and visualisation of genomic data using interactive heat-maps. *PLoS One.* **6**, e19541 (2011).
14. Zeeberg, B.R. *et al.* GoMiner: a resource for biological interpretation of genomic and proteomic data. *Genome Biol.* **4**, R28 (2003).
15. Falcon, S., Gentleman, R. Using GOstats to test gene lists for GO term association. *Bioinformatics* **23**, 257-258 (2007).
16. Goodarzi, H., Elemento, O., Tavazoie, S. Revealing Global Regulatory Perturbations across Human Cancers. *Molecular Cell.* **36**, 900-911 (2009).
17. Chen, J., Bardes, E. E., Aronow, B. J., Jegga, A. G. ToppGene Suite for gene list enrichment analysis and candidate gene prioritization. *Nucleic Acids Res.* **37**, W305-W311 (2009).
18. Chatr-Aryamontri, A. *et al.* The BioGRID interaction database: *Nucleic Acids Res.*, pii: gku1204 (2015).
19. Glaab, E., Baudot, A., Krasnogor, N., Schneider, R., Valencia A. EnrichNet: network-based gene set enrichment analysis. *Bioinformatics* **28**, i451-i457 (2012).
20. Warde-Farley, D. *et al.* The GeneMANIA prediction server: biological network integration for gene prioritization and predicting gene function. *Nucleic Acids Res.* **38**, W214-20 (2010).
21. Leung, A., Bader G.D., Reimand J. HyperModules: identifying clinically and phenotypically significant network modules with disease mutations for biomarker discovery. *Bioinformatics.* **30**, 2230-2 (2014).
22. Kerrien, S. *et al.* The IntAct molecular interaction database in 2012. *Nucleic Acids Res.* **40**, D841-6 (2012).
23. Razick, S., Magklaras, G., Donaldson, I.M. iRefIndex: a consolidated protein interaction database with provenance. *BMC Bioinformatics.* **30**, 1471-2105 (2008).
24. Ciriello, G., Cera, E., Sander C, Schultz, N. Mutual exclusivity analysis identifies oncogenic network modules. *Genome Res.* **22**, 398-406 (2012).
25. Cerami, E., Demir, E., Schultz, N., Taylor, B.S., Sander, C. Automated network analysis identifies core pathways in glioblastoma. *PLoS One.* **5**, e8918 (2010).
26. Wu, G., Dawson, E., Duong, A., Haw, R., Stein, L. ReactomeFIViz: a Cytoscape app for pathway and network-based data analysis. *F1000Res.* **3**, doi: 10.12688/f1000research.4431.2. eCollection (2014).
27. Lan, A. *et al.* ResponseNet: revealing signaling and regulatory networks linking genetic and transcriptomic screening data. *Nucleic Acids Res.* **39**, W424-9 (2011).

28. Szklarczyk, D. *et al.* STRING v10: protein-protein interaction networks, integrated over the tree of life. *Nucleic Acids Res.* **28**, pii: gku1003 (2014).
29. Vandin, F., Upfal, E., Raphael B.J. De novo discovery of mutated driver pathways in cancer. *Genome Res.* **22**, 375-85 (2012).
30. Mo, Q. *et al.* Pattern discovery and cancer gene identification in integrated cancer genomic data. *Proc Natl Acad Sci U S A.* **110**, 4245-50 (2013).
31. Drier, Y., Sheffer, M., Domany E. Pathway-based personalized analysis of cancer. *Proc Natl Acad Sci U S A.* **110**, 6388-93 (2013).
32. Mordelet, F., Vert, J.P. SIRENE: supervised inference of regulatory networks. *Bioinformatics* **24**, i76-82 (2008).
33. Vandin, F., Upfal, E., Raphael B.J. Algorithms for detecting significantly mutated pathways in cancer. *J Comput Biol.* **18**, 507-22 (2011).
34. Paull, E.O. *et al.* Discovering causal pathways linking genomic events to transcriptional states using Tied Diffusion Through Interacting Events (TieDIE). *Bioinformatics* **29**, 2757-64 (2013).
35. Tarca, A.L. *et al.* A novel signaling pathway impact analysis. *Bioinformatics* **25**, 75-82 (2009).
36. Margolin, A.A. *et al.* ARACNE: an algorithm for the reconstruction of gene regulatory networks in a mammalian cellular context. *BMC Bioinformatics* **7**, S7 (2006).
37. Huynh-Thu, V.A., Irrthum, A., Wehenkel, L., Geurts P. Inferring regulatory networks from expression data using tree-based methods. *PLoS One* **5**, e12776 (2010).
38. Vaske, C.J. *et al.* Inference of patient-specific pathway activities from multi-dimensional cancer genomics data using PARADIGM. *Bioinformatics* **26**, i237-45 (2010).
39. Ng, S. *et al.* PARADIGM-SHIFT predicts the function of mutations in multiple cancers using pathway impact analysis. *Bioinformatics* **28**, i640-i646 (2012).
40. Greenblum, S.I., Efroni, S., Schaefer, C.F., Buetow, KH. The PathOlogist: an automated tool for pathway-centric analysis. *BMC Bioinformatics* **12**, 133 (2011).
41. Saez-Rodriguez, J. *et al.* Flexible informatics for linking experimental data to mathematical models via DataRail. *Bioinformatics* **24**, 840-7 (2008).
42. Isik, Z., Ersahin, T., Atalay, V., Aykanat, C., Cetin-Atalay, R. A signal transduction score flow algorithm for cyclic cellular pathway analysis, which combines transcriptome and ChIP-seq data. *Mol Biosyst.* **8**, 3224-31 (2012).
43. Miller, M.L. *et al.* Linear motif atlas for phosphorylation-dependent signaling. *Sci Signal.* **1**, ra2 (2008).
44. Linding, R. *et al.* Systematic discovery of in vivo phosphorylation networks. *Cell.* **129**, 1415-26 (2007).
45. Klamt, S., Saez-Rodriguez, J., Gilles, E.D. Structural and functional analysis of cellular networks with CellNetAnalyzer. *BMC Syst Biol.* **1**, 2 (2007).
